# 1 Genomic Evidence for Extra-Intestinal Foodborne Disease due to 2 Zoonotic Bacteria: A Public Health Risk

3  
4 Patrice Landry Koudoum<sup>1</sup>, Luria Leslie Founou<sup>2,3,4\*</sup>, Brice Davy Dimani<sup>1#</sup>, Aurelia Mbossi<sup>2#</sup>,  
5 Jessica Ravanola Zemtsa<sup>2#</sup>, Mukanda Gedeon Kadima<sup>5</sup>, Arsène Kabamba-Tshikongo<sup>6</sup>,  
6 Jonathan Asante<sup>7</sup>, Karen H. Keddy<sup>8</sup>, Teresa Estrada Garcia<sup>9</sup>, Raspail Carrel Founou<sup>1,4,10</sup>  
7

8 <sup>1</sup>Antimicrobial Resistance and Infectious Disease (ARID) Research Unit, Research Institute of Centre  
9 of Expertise and Biological Diagnostic of Cameroon (CEDBCAM-RI)

10 <sup>2</sup>Reproductive, Maternal, Newborn and Child Health (ReMARCH) Research Unit, Research  
11 Institute of Centre of Expertise and Biological Diagnostic of Cameroon (CEDBCAM-RI)

12 <sup>3</sup>Bioinformatics & Applied Machine Learning Research Unit, EDEN Biosciences Research Institute  
13 (EBRI), EDEN Foundation, Yaoundé Cameroon

14 <sup>4</sup>Antimicrobial Research Unit, School of Health Sciences, College of Health Sciences, University of  
15 KwaZulu-Natal, Durban, South Africa

16 <sup>5</sup>Discipline of Pharmaceutical Sciences, School of Health Sciences, University of KwaZulu-Natal,  
17 Durban, South Africa

18 <sup>6</sup>Clinical Biology Laboratory, Faculty of Pharmaceutical Sciences, Université de Lubumbashi

19 <sup>7</sup>School of Pharmacy and Pharmaceutical Sciences, University of Cape Coast, Cape Coast, Ghana

20 <sup>8</sup>Department of Veterinary Tropical Diseases, Faculty of Veterinary Science, University of Pretoria,  
21 Pretoria, South Africa

22 <sup>9</sup>Department of Molecular Biomedicine, CINVESTAV-IPN, Mexico City, Mexico

23 <sup>10</sup>Department of Microbiology-Haematology and Immunology, Faculty of Medicine and  
24 Pharmaceutical Sciences, University of Dschang, Dschang, Cameroon  
25

## 26 **\*Corresponding author**

27 Dr Luria Leslie Founou

28 Reproductive, Maternal, Newborn and Child Health (ReMARCH) Research Unit,  
29 Research Institute of Centre of Expertise and Biological Diagnostic of Cameroon  
30 (CEDBCAM-RI)

31 Email: [luriafounou@gmail.com](mailto:luriafounou@gmail.com)

32 #These authors contributed equally to the work  
33  
34

## 35 **ABSTRACT**

36 Foodborne diseases (FBD) constitute a significant worldwide concern with both health and  
37 socioeconomic repercussions. FBD predominantly manifest with gastrointestinal symptoms.  
38 Nevertheless, extraintestinal infections and symptoms caused by foodborne pathogens are  
39 increasingly being reported worldwide. Furthermore, FBD caused by drug resistant bacteria  
40 causing both intestinal and extra-intestinal FBD (EIFBD) has further exacerbated their  
41 burden. This review (i) summarizes the status of intestinal foodborne pathogens, (ii)  
42 delineates the drivers, highlights the (iii) genomic evidence, and (iv) global significance of  
43 EIFBD. Understanding the transmission routes and genomic evolution of the principal  
44 bacteria causing extra-intestinal FBD is of paramount importance to fully assess the burden of  
45 FBD globally, especially in under-resourced regions of Asia, Africa, and Latin America.  
46 Acknowledging EIFBD as an integral part of FBD is critical to reach sustainable  
47 development. Integrated strategies considering the One Health approach are requisite if FBD  
48 are to be controlled, plus to ensure food safety and security.

49 **Keywords:** Extra-intestinal foodborne disease, antimicrobial resistance, zoonosis, One Health

### 50 **Data summary**

51 The authors confirm that all supporting data, code and protocols have been provided within  
52 the article or through supplementary data files.

### 53 **Impact Statement**

54 Foodborne diseases (FBD) present a global health challenge, with the significant health  
55 impact and economic costs. Commonly, these illnesses manifest as gastrointestinal troubles;  
56 however, there is an alarming increase in reports of foodborne pathogens causing infections  
57 beyond the intestinal tract. The complexity of managing FBD is worsened as various  
58 pathogens exhibit resistance to antibiotics, a concern applicable to both intestinal and  
59 extraintestinal infections.

60 This review serves several critical functions: (i) provide a current overview of the pathogens  
61 responsible for gastrointestinal FBD, (ii) examine the underlying factors contributing to the  
62 proliferation of these diseases, (iii) present insights gleaned from genomic studies, which  
63 enhance our understanding of these pathogens.

64 Grasping the mechanisms of pathogen transmission and genetic evolution is essential to  
65 accurately evaluate the worldwide impact of FBD. Acknowledging extraintestinal infections  
66 as a significant component of FBD is vital for sustainable progress. Combating FBD  
67 effectively necessitates a comprehensive "One Health" approach, which integrates the well-

68 being of humans, animals, and the environment. Such a strategy is imperative not only for  
69 controlling FBD but also for ensuring the safety and availability of food resources globally.

## 70 INTRODUCTION

71 Foodborne diseases (FBD) have been defined by the World Health Organization (WHO) as  
72 diseases caused by the ingestion of unsafe food contaminated by infectious (including  
73 bacteria, viruses, fungi, and parasites) and non-infectious agents (chemicals) (WHO, 2015). In  
74 2010, 600 million FBD cases were recorded with 420,000 deaths (WHO, 2015). FBD are a  
75 serious global public health threat that manifest mainly with gastrointestinal symptoms such  
76 as nausea, vomiting, and diarrhoea (WHO, 2015). These clinical manifestations of some FBD  
77 led to the investigation of foodborne pathogens mainly in the gastrointestinal tract (GIT),  
78 whilst some foodborne pathogens can also cause extra-intestinal infections such as urinary  
79 tract and bloodstream infections, and meningitis (Manges et al., 2019).

80 The most common bacteria causing FBD include diarrhoeagenic *Escherichia coli* (DEC)  
81 (Riveros et al., 2017; Estrada-Garcia & Navarro-Garcia, 2012), *Salmonella* spp. (Abbott et al.,  
82 2012; Jüch et al., 2013; Pulford et al., 2019), *Listeria monocytogenes* (Schlech, 2019), and  
83 *Campylobacter* spp. (Chlebicz & Ślizewska, 2018) have all been acknowledged to cause both  
84 intestinal and extra-intestinal manifestations. “Non-classical” foodborne bacteria such as  
85 extra-intestinal pathogenic *E. coli* (ExPEC) (Liu et al., 2018), *Klebsiella pneumoniae* (Davis  
86 et al., 2015), Group B *Streptococcus* (GBS) (Boonyayatra et al., 2020; Simões et al., 2021;  
87 Sørensen et al., 2019) and *Staphylococcus* spp. (Lawal et al., 2021) originating from food  
88 and/or food animals have recently been implicated in either human urinary tract infections  
89 (UTIs), sepsis, meningitis, or a combination of these diseases, with mild- to life-threatening  
90 outcomes. Nevertheless, the scope and burden of extra-intestinal foodborne diseases (EIFBD)  
91 caused by these “non-classical” foodborne bacteria are poorly documented worldwide. EIFBD  
92 without associated gastrointestinal symptoms are yet to be considered globally, even in the  
93 most advanced foodborne disease surveillance systems implemented in high-resource  
94 countries which mainly focus on intestinal FBD. This likely leads to an underestimation of the  
95 global burden of FBD.

96 Infectious FBD are frequently due to zoonotic transmission of pathogens from food animals  
97 or products of food animals (Gerner-Smidt et al., 2019). Foodborne bacteria cause FBD by  
98 numerous ways including, but not limited to the (i) production of toxins in food that is  
99 subsequently consumed by humans, (ii) production of toxins in the gastrointestinal tract after  
100 ingestion, (iii) colonization of the intestinal tract, and (iv) invasion of intestinal epithelium  
101 cells (Antunes et al., 2020). Understanding the different mechanisms and drivers of pathogen  
102 emergence, spread, and persistence in populations is essential for designing appropriate

103 prevention and containment measures against infectious diseases (Watkins et al., 2016). The  
104 relative abundance of FBD echoes with three main questions: to demonstrate that  
105 extraintestinal infections such as UPEC are indeed FBD? Are there genetic evidences of  
106 EIFBD globally? Could drug-resistant EIFBD exacerbate the burden of FBD? Therefore, the  
107 aims of this review are to: (i) summarize the current trends of intestinal FBD, (ii) delineate the  
108 evidence of EIFBD, (iii) describe the genetic evidence of EIFBD, and (iv) outline the global  
109 significance of EIFBD, to emphasize data gaps and provide a roadmap for future studies.

## 110 **I. Methods**

111 Original articles in French or English which included genetic data characterizing bacterial  
112 pathogens associated with extra-intestinal foodborne diseases were searched independently in  
113 the MEDLINE database through PUBMED by four authors, PLK, BDD, AM and JRZ.  
114 Advanced searches were done using Boolean operators AND, OR, and NOT and the key  
115 terms used included: extra-intestinal foodborne disease, foodborne disease, foodborne illness,  
116 foodborne urinary tract infections, urinary tract infection, bloodstream infection, bacteraemia,  
117 urosepsis, sepsis, meningitis, invasive disease, wound infection, *Enterobacteriaceae*,  
118 *Enterobacterales*, *Escherichia coli*, *Klebsiella pneumoniae*, *Staphylococcus*, *Streptococcus*  
119 *pyogenes* (Group A *Streptococcus*, GAS), *Streptococcus agalactiae* (Group B *Streptococcus*,  
120 GBS) , genotype, virulence, and molecular epidemiology. All relevant articles, English or  
121 French, clearly presenting the genetic link between human infections and animal food and/or  
122 food animals, published between 1<sup>st</sup> January 2015 and 29<sup>th</sup> April 2022 were included.  
123 Reviews, Case reports, and conference proceedings were excluded.

## 124 **II. Overview of intestinal foodborne diseases**

125 FBD represent one of the major causes of mortality and morbidity in humans with 600 million  
126 cases and 420000 deaths in 2010 alone (WHO, 2015). *Campylobacter* spp., *Salmonella*  
127 *enterica*, *Shiga-toxin E. coli*, *Shigella* spp., and *Listeria monocytogenes* respectively are the  
128 leading predominant bacteria involved in FBD (Crim et al., 2014). Moreover, several reports  
129 have described the role of other bacteria such as *K. pneumoniae*, *S. aureus* (Ko et al., 2018;  
130 Liu et al., 2021), GAS (Karabela et al., 2022), and GBS (Barkham et al., 2018; Tiruvayipati et  
131 al., 2021) and that they are transmitted after food consumption, therefore, they should be  
132 considered foodborne pathogens. Bacterial contamination can occur at any stage from farm-  
133 to-the-plate continuum (Founou et al., 2016; Yang et al., 2017). This section provides a  
134 general overview of foodborne bacteria and intestinal foodborne diseases (IFBD).

## 135 **1. *Escherichia coli***

136 *Escherichia coli* is a commensal and ubiquitous bacterium that has been involved in numerous  
137 cases of intestinal foodborne disease (IFBD) (Hu et al., 2021) mainly through the  
138 consumption of contaminated food (Liu et al., 2018). In 2015, the World Health Organization  
139 (WHO) published the first estimates of FBD worldwide reporting that *E. coli* caused over 110  
140 million cases of FBD resulting in over 63,000 deaths (WHO, 2015). Diarrhoeagenic *E. coli*  
141 (DEC) pathotypes including enteropathogenic (EPEC) and atypical EPEC (lacking the  
142 bundle-forming pilus), enterotoxigenic (ETEC), enteroaggregative (EAEC), diffusely  
143 adherent (DAEC) entero-invasive (EIEC), and Shiga toxin-producing *E. coli* (STEC), are  
144 important causes of diarrhoea in children, of travellers' diarrhoea (TD), and diarrhoea in  
145 immunocompromised patients (Martínez-Santos et al., 2021). STEC can be specifically  
146 associated with haemolytic uremic syndrome, while ETEC and EAEC with TD (Cabrera-Sosa  
147 & Ochoa, 2020; Jiang & DuPont, 2017).

148 The foodborne transmission of *E. coli* has been clearly evidenced by its impact on human  
149 health (WHO, 2015). A study conducted in South Korea, where the authors performed the  
150 molecular characterization of *E. coli* in human stool, environmental and preserved food  
151 samples demonstrated that consumption of egg-based foods was associated with atypical  
152 EPEC O157:H45 infections with an attack rate of 2.5% (Park et al., 2014).

## 153 **2. *Salmonella* spp.**

154 Foodborne *Salmonella* infections contribute substantially to morbidity and mortality  
155 worldwide (WHO, 2015). *Salmonella* is of public health concern due to the burden of  
156 salmonellosis and frequent reports of AMR. AMR salmonellae are difficult to treat, increasing  
157 the number of deaths due to FBD (Chlebicz & Ślizewska, 2018). Misuse of antimicrobials for  
158 animal husbandry and in the treatment of infections has impacted the rising incidence of  
159 AMR in salmonellosis.

160 Globally, 3.4 million non-typhoidal *Salmonella* (NTS) infections occur resulting in close to  
161 19,000 deaths yearly (Stanaway et al., 2019). In the United States of America (USA), high-  
162 resolution whole genome sequenced (WGS) revealed close phylogenetic relationships  
163 between NTS serovars detected in humans, food animals, and agricultural environmental  
164 sources different hosts, indicating the importance of pathogens of animal origin in FBD  
165 (Pornsukarom et al., 2018). Likewise, another study carried out in China demonstrated with  
166 WGS, that *S. Typhimurium* isolated from pigs was responsible for a large proportion of FBD  
167 although this may not be the case in countries where pork is not eaten (Sun et al., 2020).

168

### 169                   3. *Campylobacter* spp.

170    Campylobacteriosis is a zoonosis whose main reservoir is the digestive tract of wild or  
171    domestic birds, such as poultry, but also other food animals like sheep, cattle, and pigs  
172    (Ahmed & Gulhan, 2021). *Campylobacter* species are usually commensal in animals but can  
173    spread to humans directly or indirectly through ingestion of contaminated food or water  
174    (Facciola et al., 2017). *Campylobacter* spp. is one of the most important foodborne pathogens  
175    even in high-income countries (Facciola et al., 2017). In 2010, *Campylobacter* spp. caused  
176    around 96 million FBD cases and 21,500 deaths worldwide (WHO, 2015). The most common  
177    species involved in human infections are *Campylobacter jejuni* and *Campylobacter coli*  
178    (Aksomaitiene et al., 2019). *C. jejuni* population structures are weakly clonal, resulting in the  
179    plasticity of the *Campylobacter* genome. The latter is susceptible to point mutations and  
180    genomic instability and can readily take up foreign DNA and an enormously diverse  
181    population irrespective of which typing system is used (Newell et al., 2010). Nevertheless,  
182    some stable clones of *C. jejuni* have persisted, and such clones may provide insight on  
183    changing trends (Newell et al., 2010).

184    By genotypically characterising with multi-locus sequence typing (MLST) *C. jejuni* isolates  
185    in different sources of isolation (human, chicken, dairy cattle, and wild birds), in Lithuania,  
186    Aksomaitiene et al. (2019) showed that from a total of 341 isolates originating from humans,  
187    chickens, cattle and wild birds, CC1034 and CC403 sequence types (ST) were found in all  
188    hosts demonstrating that cattle and wild birds were the main reservoirs of *C. jejuni* isolated  
189    from human infections (Aksomaitiene et al., 2019).

### 190                   4. *Staphylococcus aureus*

191    Staphylococcal food poisoning is one of the most common FBD in the world. Approximately  
192    241,000 cases of FBD are caused by *S. aureus* every year in the USA (Scallan et al., 2011).  
193    Raw or undercooked food, especially food of animal origin and nasal carriage by food  
194    workers are identified as important reservoirs of *S. aureus* causing FBD (Wang et al., 2017).  
195    The ingestion of staphylococcal toxins produced by certain strains is the main cause of  
196    disease symptoms (Hennekinne et al., 2012). Some virulence genes such as those encoding  
197    for the toxic shock syndrome toxin 1 (TSST-1), exfoliative toxins, and cytolytic toxins are  
198    involved in staphylococcal food poisoning (Argudín et al., 2010). In an epidemiological  
199    surveillance study in China, 163 *S. aureus* isolates were analysed by pulse field gel  
200    electrophoresis (PFGE) with some isolates originating from foodstuffs such as rice noodles  
201    and rice rolls, showing identical profiles with those collected in humans with clinical signs of  
202    food poisoning (Liao et al., 2018). Likewise, Lui et al. (2021) performed a genotypic



203 characterisation of *S. aureus* isolated from animal samples collected at farms and markets in  
204 Xinjiang province and demonstrated that meat originating from abattoirs and farms was  
205 contaminated with virulent *S. aureus*. They confirmed the spread of these virulent lineages of  
206 *S. aureus* in the food chain and their involvement in FBD (Liu et al., 2021).

### 207 **III. Drivers of extra-intestinal foodborne diseases**

208 A complication of diarrhoeal foodborne diseases is their capacity, in some cases, to become  
209 systemic diseases (Hoffmann et al., 2020). Intestinal barriers existing prevent any harmful  
210 elements including toxins and bacteria from disseminating to the bloodstream and other  
211 organs or tissues (Li & Tan, 2020). Factors that directly or indirectly allow foodborne bacteria  
212 to breach this barrier are EIFBD drivers. The drivers of EIFBD include a triad of (i) host  
213 susceptibility (ii) genomic diversity within pathogens, and (iii) food contamination, which are  
214 known to drive the transmission of pathogenic bacteria to humans as seen in figure 1 below  
215 (Antunes et al., 2020). While food contamination can directly or indirectly lead to EIFBD,  
216 bacterial pathogenicity, and host susceptibility are favouring factors which might lead to an  
217 EIFBD after an IFBD has already been established (Antunes et al., 2020).

#### 218 **1. Host susceptibility**

219 The main host factor favouring EIFBD is immunosuppression, which increases the host's  
220 vulnerability to pathogens (Lund & O'Brien, 2011). One of the main vulnerable groups to  
221 infections due to FBP are undernourished children from sub-Saharan Africa and Latin  
222 America, their increased susceptibility to diarrhoeagenic pathogens has clearly been  
223 established (Acosta et al., 2016; Opintan et al., 2010).

224 Other vulnerable groups include people living with acquired immunodeficiency syndrome  
225 (AIDS), people with physiologically impaired immune systems like pregnant women, the  
226 elderly as well as individuals on immune suppressive drugs or cancer therapy (Lund &  
227 O'Brien, 2011). This vulnerability leads to a reduction of the load of organisms required to  
228 cause infectious diseases and, is therefore, easily associated with bacterial dissemination to  
229 extra-intestinal sites due to the lowering of host's immune defences which are supposed to  
230 prevent this (Lund & O'Brien, 2011). Immunocompromised individuals are thus more prone  
231 to have an EIFBD and more severe diseases caused by extra-intestinal dissemination.

#### 232 **2. Foodborne bacteria pathogenicity and diversity**

233 Bacteria are subjected to adverse conditions that contribute to their stress, favouring their  
234 survival, or acquisition of new traits (Begley & Hill, 2015). These traits are responsible for  
235 virulence in foodborne pathogens and differ between species and subtypes (Table 1). The



236 acquisition of virulence factors involved in pathogenicity and of resistance genes leading to  
237 antimicrobial resistance or exposure to a hostile environment may allow bacteria to become  
238 more virulent, persist in the host by counteracting the innate and adaptive immune responses,  
239 spread to other tissues, and subsequently lead to extra-intestinal infections (Cavestri, 2020).  
240 The presence in the human host of foodborne bacteria harbouring antibiotic-resistance genes  
241 could favour extra-intestinal dissemination of these pathogens because antibiotics do not  
242 eliminate them, and microorganisms could then colonize other niches. For instance, when the  
243 host's immune system fails to eradicate antimicrobial-resistant bacteria from the  
244 gastrointestinal tract, bacteria might persist within the gut for an extended duration.  
245 Consequently, they could breach the intestinal barrier and enter the systemic circulation,  
246 potentially resulting in an extraintestinal infection. This is supported by the existence of  
247 virulence genes co-located along with antibiotic resistance genes encoded on mobile genetic  
248 elements such as plasmids (Beceiro et al., 2013; Singer, 2015). For instance, non-typhoidal  
249 *Salmonella* (NTS) isolated from retail meat were involved in infections in children and those  
250 infected with drug-resistant NTS strains were more likely to develop severe sepsis than those  
251 with the drug-susceptible *Salmonella* (Chang et al., 2020).

### 252 **3. Food contamination**

253 In recent years the emergence, dissemination, persistence, and exposure of highly  
254 resistant/virulent foodborne bacteria at each step of the food production chain has increased  
255 due to the intensification of food production activities in the agricultural and livestock sectors,  
256 and large-scale distribution of food products to cope with the global food demand (Founou et  
257 al., 2021). This is particularly true in low- and middle-income countries (LMICs) as a result  
258 of poor hygiene and sanitation, inadequate handling processes, insufficient safety control  
259 measures during operations, poor control of the use of antibiotics as growth promoters, and  
260 sub-optimal storage facilities (Founou et al., 2021). Food contamination can occur through  
261 direct spread from infected animals or animal excretions, or via contamination with foodborne  
262 bacteria on the hands of food handlers (Founou et al., 2021; Founou et al., 2016). Although  
263 gastrointestinal disease is usually self-limiting, systemic dissemination may occur if  
264 vulnerable patients infected with resistant pathogens are treated with the incorrect antibiotic.  
265 The globalization of trade of food products is a major factor contributing to the spread of  
266 foodborne pathogens internationally (Tiseo et al., 2020) and AMR pathogens causing both  
267 IFBD and EIFBD can cross country/continental borders when contaminated food products are  
268 transported from one region of the world to another.

269

270

#### 271 **IV. Burden and genetic evidence of extra-intestinal foodborne diseases**

272 Foodborne bacteria are now increasingly being recognised in extra-intestinal infections  
273 (Riley, 2020), but because of (i) the relatively long incubation period between gastro-  
274 intestinal tract (GIT) colonization and dissemination to other body systems, (ii) poor  
275 understanding of this paradigm by physicians, and (iii) insufficient investigation of the  
276 transmission routes associated with invasive infections, it is difficult to ascertain causality in  
277 most cases. Nevertheless, some studies provided genetic evidence on EIFBD especially  
278 urinary tract infections (UTIs), sepsis, and meningitis, that were caused by *E. coli*, *K.*  
279 *pneumonia*, *S. saprophyticus*, and Group B *Streptococcus* (GBS) as disclosed below and in  
280 Table 2.

##### 281 **1. Urinary tract infection (UTI)**

282 Urinary tract infections (UTIs) are a serious public health problem and are the most common  
283 bacterial infections in women of economically active age worldwide with over 150 million  
284 cases yearly (Flores-Mireles et al., 2015). Foodborne bacteria can transiently colonize the  
285 human gastrointestinal tract after ingestion (either directly after contact with an  
286 infected/contaminated animal or indirectly via food or contaminated surfaces) where they  
287 could later spread to the urinary tract (Flores-Mireles et al., 2015). This hypothesis is more  
288 plausible and thus more beneficial for bacteria invading the female urogenital tract since  
289 women have a shorter urethra than men (Nordstrom et al., 2013). Bacteria can ascend from  
290 the lower urinary tract to the ureter and then to the kidneys, causing pyelonephritis. From the  
291 kidneys, bacteria can disseminate to the bloodstream, known as urosepsis, a life-threatening  
292 condition with high mortality rates of 20-40% (Dreger et al., 2015; Riley, 2020).

##### 293 **1.1. *Escherichia coli***

294 Uropathogenic *E. coli* (UPEC) is the single most prevalent uropathogen causing 70-95% of all  
295 UTIs (Singer, 2015) and belonging to the broad group of extra-intestinal pathogenic *E. coli*  
296 (ExPEC) having virulence factors enable it to thrive in environments other than the human  
297 gastro-intestinal tract including the human urogenital tract (Flores-Mireles et al., 2015). Liu et  
298 al. prospectively assessed the role of foodborne *E. coli* ST131-H22 as an uropathogen using  
299 core genome single nucleotide polymorphisms (cgSNP)-based phylogenetic analysis (Liu et  
300 al., 2018). *E. coli* ST131 detected in retail meat (pork and chicken) were closely related to *E.*  
301 *coli* isolates from human clinical samples including urine and blood (Liu et al., 2018).  
302 Moreover, human clinical *E. coli* ST131-H22 strains harbouring the CoIV plasmid, typically

303 ascribed to avian pathogenic *E. coli*, were more closely related to *E. coli* ST131-H22 strains  
304 from meat sources, in comparison to those strains lacking the ColV plasmid. This suggests  
305 that poultry could be a source of not only intestinal but also extra-intestinal human infections  
306 such as UTI and urosepsis (Liu et al., 2018).

### 307 **1.2. *Klebsiella pneumoniae***

308 Though not acknowledged as a “classical” foodborne pathogen, *K. pneumoniae* strains  
309 originating from animals have also been identified in clinical infections. Davis et al., (2015),  
310 reported that *K. pneumoniae* strains, isolated from urine samples of UTI patients, exhibited a  
311 high degree of genetic similarity to strains found in retail meat in the USA (Davis et al.,  
312 2015). The authors analysed 508 retail meat samples (pork, turkey, and chicken) and 1728  
313 clinical urine samples from UTIs patients, and the core genome SNP-based phylogenetic  
314 analysis of 83 *K. pneumoniae* isolates from both retail meat and urine samples, revealed five  
315 closely related human-meat isolate pairs were genomically closely related (Davis et al., 2015).  
316 Furthermore, Davis et al. (2015) study revealed that after testing in a murine sepsis model, the  
317 five *K. pneumoniae* isolate pairs displayed a comparable virulence profile. The authors  
318 concluded that the high genetic relatedness and similar virulence profile strongly suggested  
319 that UTI-causing *K. pneumoniae* could likely have an animal origin, emphasizing the need for  
320 further consideration of *K. pneumoniae* in EIFBD (Davis et al., 2015).

### 321 **1.3. *Staphylococcus saprophyticus***

322 *S. saprophyticus* is the one of most prevalent Gram-positive uropathogens causing  
323 uncomplicated UTIs (Flores-Mireles et al., 2015). De Paiva-Santos et al. after analyzing the  
324 virulome of 142 *S. saprophyticus* isolates collected from cheese, recreational water, and urine  
325 specimens of UTI patients found similar virulence gene profiles among the strains from all  
326 sources (de Paiva-Santos et al., 2018). Based on these results, the authors surmised the  
327 elevated uropathogenic potential of foodborne (cheese-borne) *S. saprophyticus* isolates (de  
328 Paiva-Santos et al., 2018). Likewise, SNP-based phylogenetic analysis of 128 *S.*  
329 *saprophyticus* isolates causing UTIs and 104 isolates from several sources of the  
330 slaughterhouse including from pigs, raw pork meat, and the slaughterhouse environment,  
331 workers, and equipment demonstrated that *S. saprophyticus* causing UTIs was of foodborne  
332 origin since the *S. saprophyticus* isolates from the pig and raw meat clustered together with  
333 the UTI patient, and slaughterhouse workers *S. saprophyticus* isolates (Lawal et al., 2021).  
334 Interestingly, all *S. saprophyticus* isolates from this cluster harboured the antiseptic and  
335 disinfectant-resistant gene *qacA*, its expression favours the persistence of these bacteria on

336 hands and contaminated surfaces even after disinfection, thus enabling *S. saprophyticus*  
337 transmission at the animal-environment-human interface (Lawal et al., 2021).

338

## 339 **2. Sepsis and bloodstream infections**

340 Group B *Streptococcus* (GBS) has gained notoriety as the leading cause of neonatal infections  
341 and deaths with high mortality rates globally (Seale et al., 2017). Group B *Streptococcus* has  
342 been associated with cattle and more recently with fish and some lineages are considered as  
343 foodborne bacteria (Kayansamruaj et al., 2019). Furthermore, some studies have reported  
344 indistinguishable and highly related PFGE profiles between bovine, fish, and human GBS  
345 isolates (Boonyayatra et al., 2020; Simões et al., 2021; Sørensen et al., 2019). For instance,  
346 Simões et al. (2021) found a closely related hypervirulent GBS serotype III/ST17 between  
347 isolates from bovine milk and that from a neonate presenting with GBS infection albeit the  
348 authors did not specify if the mother was screened for carriage (Simões et al., 2021). Of  
349 interest, these GBS isolates not only shared identical MLSTs and similar PFGE profiles but  
350 (i) had identical antimicrobial resistance profiles, (ii) harboured the hyper-virulent GBS  
351 adhesin (HvgA) *gbs2018-C* gene, genes encoding for pilus variants PI-1, PI-2a and PI-2b, (iii)  
352 possessed DNase activity and (iv) harboured the *tetM* gene (Simões et al., 2021). The fact that  
353 these GBS strains have similar phenotypic, genotypic, and high-resolution phylogenetic  
354 characteristics strongly underscores the role of bovine GBS serotype III/ST17 in the  
355 vulnerable neonatal and infant population.

## 356 **3. Meningitis**

357 Bacterial meningitis is still a global health problem, associated with high morbidity and  
358 mortality worldwide (Bystritsky & Chow, 2022). Considerable progresses have already been  
359 made in the diagnosis and treatment of bacterial meningitis caused by frequently incriminated  
360 pathogens such as *S. pneumoniae*, *N. meningitidis*, and GBS (van de Beek et al., 2021). GBS  
361 is among the leading cause of meningitis in newborns who inhale or ingest amniotic fluid  
362 before or during delivery (Fischer et al., 2021). Of the ten known GBS capsular serotypes, six  
363 (Ia, Ib, II, III, IV, and V) are the most frequent serotypes associated with invasive disease and  
364 the clone GBS III/ST17, associated with GBS meningitis (Pellegrini et al., 2022).  
365 Kayansamruaj et al. (2019). In a longitudinal study conducted in Thailand and Vietnam the  
366 comparison between 21 sequenced GBS genomes by phylogenetic analysis revealed a  
367 correlation between the genomes of species isolated from fish and those causing neonatal  
368 meningitis in both countries (Kayansamruaj et al., 2019). Barkham et al (Barkham et al.,  
369 2019) reported that GBS ST283 strains isolated from diseased fishes in Thailand were closely

370 related to the GBS ST28 strain causing human invasive disease in Singapore (Kayansamruaj  
371 et al., 2019). The above-mentioned studies strongly underline the role of both bovines and  
372 fishes as reservoirs of virulent GBS strains and their contribution to human invasive disease.  
373 They further suggest that a subset of the meningitis cases occurring worldwide might likely  
374 have a foodborne origin.

## 375 **V. Antimicrobial resistance and extra-intestinal foodborne diseases**

376 Antimicrobial resistance (AMR) is one of the greatest health threats of the 21<sup>st</sup> century.  
377 According to the Global Research on Antimicrobial Resistance Project (*GRAM*) report,  
378 antibiotic-resistant bacterial infections were associated with nearly 5 million deaths and were  
379 directly responsible for 1.27 million deaths globally, in 2019 (Murray et al., 2022). The global  
380 increasing rate of AMR is alarming, and the world is making a day-to-day step into a post-  
381 antibiotic era. The use of antimicrobials in food animal production as growth promoters, for  
382 metaphylactic or prophylactic purposes is further exacerbating this concern (Tiseo et al.,  
383 2020). Moreover, the global use of antibiotics in food animal production in 2017 was  
384 estimated to be 93,309 tonnes and it is expected to rise to 104,079 tonnes by 2030 (Tiseo et  
385 al., 2020). More worrisome is that 73% of all sales of antibiotics worldwide including those of  
386 clinical importance are for use in the food producing industry (Van Boeckel et al., 2019).  
387 Antibiotic use in food-animal production is reportedly known to trigger a selection pressure  
388 leading to the rapid emergence and spread of antibiotic-resistant bacteria (ARB) and  
389 antibiotic-resistant genes (ARGs) at the animal-human-environment interfaces (Founou et al.,  
390 2021). AMR is a quintessential One Health issue needing urgent global and multifaceted  
391 actions for its containment.

392 It is well known that AMR reduces therapeutic choices, thus causing difficult-to-treat  
393 infections or increasing mortality rates (Murray et al., 2022). There is a reported increase in  
394 the prevalence of antimicrobial resistance in virulent *E. coli*, especially *E. coli* ST131 ExPEC  
395 strains isolated from food animals and humans (Singer, 2015). The study conducted by Liu et  
396 al. (2018) on *E. coli* ST131-H22 previously discussed above showed a high level of multidrug  
397 resistance (80% for animal sources and 33% for human sources), with some isolates  
398 harbouring mobile colistin resistance (*mcr*) gene (Liu et al., 2018). Resistance to the last  
399 resort antibiotic drug, colistin, is of particular concern as resistant bacteria can disseminate  
400 from animals to humans (Liu et al., 2018), resulting in difficult-to-treat extra-intestinal  
401 diseases with restricted treatment options and associated higher mortality rates.

## 402 **VI. The global significance of extra-intestinal foodborne diseases**

403 EIFBD are important threats that should be considered as part of FBD surveillance systems.  
404 The pathogen that typically displays the significance of EIFBD are ExPEC group, which  
405 causes numerous human health infections globally with both economic and social costs  
406 (Manges et al., 2019). Nevertheless, the clinical and socioeconomic impact of ExPEC  
407 infections, especially regarding increasing AMR, is underappreciated and neglected (Manges  
408 et al., 2019). Extraintestinal pathogenic *Escherichia coli* have been linked with several  
409 environmental reservoirs and transmission routes. One of the major challenges in recognising  
410 EIFBD and ExPEC infections as a public health threat is the absence of routine molecular  
411 investigation or genomics studies (Manges et al., 2019). In the absence of large-scale, routine,  
412 public health reporting, or surveillance systems that consider the One Health compartments, it  
413 is not possible to capture information on circulating lineages nor to provide a complete  
414 snapshot of the genomic evolution, transmission dynamics, and lineages of ExPEC and other  
415 pathogens causing EIFBD.

416 Most of the large-scale genomic studies of ExPEC have been conducted in high income  
417 countries of Europe and North America (Manges et al., 2019) revealing the necessity of  
418 conducting more studies worldwide, particularly in low-and middle-income countries  
419 (LMICs). Thus, data from Asia, Africa and Latin America are scarce despite recent efforts to  
420 improve regional capacity to perform genomic analyses, but they are still very expensive for  
421 these countries. Understanding the genomic epidemiology of key circulating lineages in these  
422 regions is important in order to decipher the transmission routes of foodborne pathogens,  
423 predict their likely public health implication, to implement sustainable infection prevention  
424 and control (IPC) measures nationally, regionally, and internationally. The importance of  
425 these studies was clearly shown by a study conducted in Yucatan, Mexico, which revealed a  
426 phenotypic (identical drug resistance profiles) and genetical relatedness by PFGE between  
427 NTS isolated from human clinical cases, asymptomatic children of Salmonella, suggesting  
428 that dissemination through the food chain occurs (Zaidi et al., 2006).

429 Another important challenge to recognize the significance of EIFBD is the distinction  
430 between commensal and pathogenic lineages (Riley, 2020). The high resolution provided by  
431 whole-genome sequencing can allow the detection and appreciation of the wide variety of  
432 extra-intestinal illnesses caused by foodborne bacteria. However, even when genomic data are  
433 available, it is still challenging to clearly define some ExPEC strains and estimate their  
434 disease burden as there are no exclusive ExPEC-defining genes as most of these genes are  
435 shared with commensal lineages (Sarowska et al., 2019). The global food production and  
436 distribution systems coupled with the increasing antimicrobial resistance likely contribute to



437 higher incidence and associated mortality due to EIFBD (Riley, 2020). In this era marked by  
438 globalization of trade and humans as well as global population growth, it is important to  
439 acknowledge extra-intestinal foodborne bacteria including ExPEC as overlooked “killers”, yet  
440 potentially important endemic issues especially in LMICs (Russo & Johnson, 2003).  
441 Additionally, the role of certain bacterial lineages in the global spread of AMR and antibiotic  
442 resistance genes has not been fully established, nor has the overall contribution of resistant  
443 EIFBD to the global burden of FBD. Extraintestinal foodborne diseases have traditionally not  
444 retained a level of attention commensurate with their contribution to morbidity, mortality, and  
445 socioeconomic costs in the past, likely because causative bacteria were highly antibiotic  
446 susceptible, consequently, easily eradicated with first-line antibiotic therapy (Ventola, 2015).  
447 Unfortunately, the global dissemination of antibiotic-resistant and of highly virulent  
448 pathogens has recently changed this paradigm. A retrospective study performed in the USA  
449 assessing AMR in *E. coli* isolated from humans and food animals including pigs, chickens,  
450 and cattle revealed an exponential increase in drug resistance over a 42 years-period (1950-  
451 2002) (Tadesse et al., 2012). Out of the 1,729 *E. coli* isolates tested against 15 antibiotics  
452 during this period, a statistically significant ( $<0.001$ ) upward trend in resistance was seen for  
453 ampicillin, sulfamethoxazole, and tetracycline (Tadesse et al., 2012). Likewise, animal strains  
454 displayed increased resistance to 11/15 antibiotics including gentamicin, sulphonamide, and  
455 ampicillin. The authors further revealed that the level of multidrug resistance (resistance to  
456 three or more classes of antibiotics) increased from 7.2% in 1950 to 63.6% during the 2000s  
457 (Tadesse et al., 2012). Furthermore, strains from the ExPEC group have the notorious  
458 distinction of harbouring new emerging antibiotic resistance genes (Manges et al., 2019). The  
459 WHO estimated that the global burden of FBD due to foodborne bacteria, viruses, and  
460 protozoa, particularly NTS and EPEC, caused nearly 600 million cases of infections, 200,000  
461 cases of deaths, and these were attributed to 16 million disability adjusted life years (DALYs)  
462 in 2010 (WHO, 2015). This burden would be exacerbated by the inclusion of EIFBD.  
463 Hundreds of thousands of lives, millions of workdays, and billions of healthcare dollars, are  
464 lost every year due to EIFBD (Russo & Johnson, 2003). New treatment and prevention  
465 measures for EIFBD are needed to improve outcomes whilst reducing global EIFBD burdens.  
466 Vaccine development and deployment strategies targeting foodborne bacteria could also be  
467 suboptimal if EIFBD are not considered in population structure and transmission dynamic  
468 studies.

## 469 **Conclusion**



470 Bacterial FBD is a global public health issue with multiple clinical and socioeconomic  
471 implications, including escalating AMR. This review focuses on the contribution of EIFBD to  
472 the global burden of FBD. It argues that recognizing EIFBD as an integral part of FBD is  
473 critical to assessing the true burden of FBD. It also emphasized the instrumental role of  
474 genomic and phenotypic (drug-resistance profiles) studies, since several studies have shown  
475 genetic relatedness is accompanied by similar drug resistance profiles. Therefore, together the  
476 genotypic and phenotypic characterization of isolates from clinical cases and food sources  
477 will be pivotal to understanding, detecting, preventing, and containing FBD, and in designing  
478 tailored interventions. It further underscores that identifying the transmission routes, the  
479 genomic structure, the virulence profiles, and the evolution of the principal circulating  
480 lineages, especially in underrepresented regions of Asia and Africa, is of paramount  
481 importance to fully assess the contribution of EIFBD to the global burden of FBD. An  
482 integrated strategy considering the One Health approach is requisite if we are to address FBD  
483 and ensure food safety and security globally.

#### 484 **Author contributions**

485 **PLK** co-conceptualized the study, searched the literature, extracted, and collated data, and  
486 drafted the manuscript. **DBD**, **AM** and **JRZ**, searched the literature, extracted, and collated  
487 data, and drafted the manuscript. **LLF** co-conceptualized the study, vetted the data,  
488 supervised and drafted the manuscript. **MGK**, **AKT**, **JA**, **KHK**, **TEG**, and **RCF** provided  
489 substantial contribution in writing and revising the manuscript. All authors read and approved  
490 the final manuscript.

#### 491 **Transparency declaration**

492 The authors declare that there is no conflict that could be construed as a financial interest.

#### 493 **Funding**

494 This research received no specific grant from any funding agency in the public, commercial or  
495 not-for-profit sectors.

#### 496 **References**

- 497 Abbott, S. L., Ni, F. C., & Janda, J. M. (2012). Increase in extraintestinal infections caused by  
498 *Salmonella enterica* subspecies II-IV. *Emerg Infect Dis*, 18(4), 637-639.  
499 doi:10.3201/eid1804.111386
- 500 Acosta, G. J., Vigo, N. I., Durand, D., Riveros, M., Arango, S., Zambruni, M., & Ochoa, T. J.  
501 (2016). Diarrheagenic *Escherichia coli*: prevalence and pathotype distribution in

- 502 children from Peruvian rural communities. *The American journal of tropical medicine*  
503 *and hygiene*, 95(3), 574.
- 504 Ahmed, N. A., & Gulhan, T. (2021). Campylobacter in Wild Birds: Is It an Animal and Public  
505 Health Concern? *Front Microbiol*, 12, 812591. doi:10.3389/fmicb.2021.812591
- 506 Aksomaitiene, J., Ramonaite, S., Tamuleviciene, E., Novoslavskij, A., Alter, T., &  
507 Malakauskas, M. (2019). Overlap of Antibiotic Resistant Campylobacter jejuni MLST  
508 Genotypes Isolated From Humans, Broiler Products, Dairy Cattle and Wild Birds in  
509 Lithuania. *Front Microbiol*, 10, 1377. doi:10.3389/fmicb.2019.01377
- 510 Antunes, P., Novais, C., & PEIXE, U. (2020). Food-to-Humans Bacterial Transmission.  
511 *Microbiology Spectrum, American Society for Microbiology Press*.  
512 doi:10.1128/microbiolspec.MTBP-0019-2016.
- 513 Argudín, M. Á., Mendoza, M. C., & Rodicio, M. R. (2010). Food poisoning and  
514 Staphylococcus aureus enterotoxins. *Toxins*, 2(7), 1751-1773.
- 515 Barkham, T., Sheppard, A., Jones, N., & Chen, S. L. (2018). Streptococcus agalactiae that  
516 caused meningitis in healthy adults in 1998 are ST283, the same type that caused a  
517 food-borne outbreak of invasive sepsis in 2015: an observational molecular  
518 epidemiology study. *Clin Microbiol Infect*, 24(8), 923-925.  
519 doi:10.1016/j.cmi.2018.04.006.
- 520 Barkham, T., Zadoks, R. N., Azmai, M. N. A., Baker, S., Bich, V. T. N., Chalker, V., et al.  
521 (2019). One hypervirulent clone, sequence type 283, accounts for a large proportion of  
522 invasive Streptococcus agalactiae isolated from humans and diseased tilapia in  
523 Southeast Asia. *I3(6)*, e0007421. doi:10.1371/journal.pntd.0007421.
- 524 Beceiro, A., Tomás, M., & Bou, G. (2013). Antimicrobial resistance and virulence: a  
525 successful or deleterious association in the bacterial world? *Clin Microbiol Rev*, 26(2),  
526 185-230. doi:10.1128/cmr.00059-12.
- 527 Begley, M. A., & Hill, C. (2015). Stress Adaptation in Foodborne Pathogens. *Annu. Rev.*  
528 *Food Sci. Technol.* 2015.6. Downloaded from [www.annualreviews.org](http://www.annualreviews.org), 20(6:9), 1-9.
- 529 Boll, E. J., Ayala-Lujan, J., Szabady, R. L., Louissaint, C., Smith, R. Z., Krogfelt, K. A., et al.  
530 (2017). Enteroaggregative Escherichia coli Adherence Fimbriae Drive Inflammatory  
531 Cell Recruitment via Interactions with Epithelial MUC1. *mBio*, 8(3).  
532 doi:10.1128/mBio.00717-17
- 533 Boonyayatra, S., Wongsathein, D., & Tharavichitkul, P. (2020). Genetic Relatedness Among  
534 Streptococcus agalactiae Isolated from Cattle, Fish, and Humans. *Foodborne Pathog*  
535 *Dis*, 17(2), 137-143. doi:10.1089/fpd.2019.2687.

- 536 Bystritsky, R. J., & Chow, F. C. (2022). Infectious Meningitis and Encephalitis. *Neurol Clin*,  
537 40(1), 77-91. doi:10.1016/j.ncl.2021.08.006.
- 538 Cabrera-Sosa, L., & Ochoa, T. J. (2020). 46 - Escherichia coli Diarrhea. In E. T. Ryan, D. R.  
539 Hill, T. Solomon, N. E. Aronson, & T. P. Endy (Eds.), *Hunter's Tropical Medicine*  
540 *and Emerging Infectious Diseases (Tenth Edition)* (pp. 481-485). London: Elsevier.
- 541 Cavestri, C. (2020). Etude de la survie et de la virulence de salmonella enterica ssp. dans les  
542 modèles gastro entérique humain. *Université LAVAL*.
- 543 Chang, Y. J., Chen, M. C., Feng, Y., Su, L. H., Li, H. C., Yang, H. P., et al. (2020). Highly  
544 antimicrobial-resistant Nontyphoidal Salmonella from retail meats and clinical impact  
545 in children, Taiwan. *Pediatr Neonatol*, 61(4), 432-438.  
546 doi:10.1016/j.pedneo.2020.03.017
- 547 Chlebicz, A., & Śliżewska, K. (2018). Campylobacteriosis, Salmonellosis, Yersiniosis, and  
548 Listeriosis as Zoonotic Foodborne Diseases: A Review. *Int J Environ Res Public*  
549 *Health*, 15(5). doi:10.3390/ijerph15050863
- 550 Crim, S. M., Iwamoto, M., Huang, J. Y., Griffin, P. M., Gilliss, D., Cronquist, A. B., et al.  
551 (2014). Incidence and trends of infection with pathogens transmitted commonly  
552 through food--Foodborne Diseases Active Surveillance Network, 10 U.S. sites, 2006-  
553 2013. *MMWR Morb Mortal Wkly Rep*, 63(15), 328-332.
- 554 Davis, G. S., Waits, K., Nordstrom, L., Weaver, B., Aziz, M., Gauld, L., et al. (2015).  
555 Intermingled Klebsiella pneumoniae Populations Between Retail Meats and Human  
556 Urinary Tract Infections. *Clin Infect Dis*, 61(6), 892-899. doi:10.1093/cid/civ428
- 557 de Paiva-Santos, W., de Sousa, V. S., & Giambiagi-deMarval, M. (2018). Occurrence of  
558 virulence-associated genes among Staphylococcus saprophyticus isolated from  
559 different sources. *Microb Pathog*, 119, 9-11. doi:10.1016/j.micpath.2018.03.054
- 560 Dreger, N. M., Degener, S., Ahmad-Nejad, P., Wöbker, G., & Roth, S. (2015). Urosepsis--  
561 Etiology, Diagnosis, and Treatment. *Dtsch Arztebl Int*, 112(49), 837-847; quiz 848.  
562 doi:10.3238/arztebl.2015.0837
- 563 Estrada-Garcia, T., & Navarro-Garcia, F. (2012). Enteroaggregative Escherichia coli  
564 pathotype: a genetically heterogeneous emerging foodborne enteropathogen. *FEMS*  
565 *Immunol Med Microbiol*, 66(3), 281-298. doi:10.1111/j.1574-695X.2012.01008.x
- 566 Facciola, A., Riso, R., Avventuroso, E., Visalli, G., Delia, S. A., & Laganà, P. (2017).  
567 Campylobacter: from microbiology to prevention. *J Prev Med Hyg*, 58(2), E79-e92.
- 568 Fischer, P., Pawlowski, A., Cao, D., Bell, D., Kitson, G., Darsley, M., & Johansson-Lindbom,  
569 B. (2021). Safety and immunogenicity of a prototype recombinant alpha-like protein

- 570 subunit vaccine (GBS-NN) against Group B Streptococcus in a randomised placebo-  
571 controlled double-blind phase 1 trial in healthy adult women. *Vaccine*, 39(32), 4489-  
572 4499. doi:10.1016/j.vaccine.2021.06.046
- 573 Flores-Mireles, A. L., Walker, J. N., Caparon, M., & Hultgren, S. J. (2015). Urinary tract  
574 infections: epidemiology, mechanisms of infection and treatment options. *Nat Rev*  
575 *Microbiol*, 13(5), 269-284. doi:10.1038/nrmicro3432
- 576 Founou, L. L., & Founou, R. C. (2021). Antimicrobial resistance in the farm-to-plate  
577 continuum: more than a food safety issue. 7(5), Fso692. doi:10.2144/fsoa-2020-0189
- 578 Founou, L. L., Founou, R. C., & Essack, S. Y. (2016). Antibiotic Resistance in the Food  
579 Chain: A Developing Country-Perspective. *Frontiers in Microbiology*, 7(1881).  
580 doi:10.3389/fmicb.2016.01881
- 581 Founou, L. L., Founou, R. C., & Essack, S. Y. (2021). Antimicrobial resistance in the farm-  
582 to-plate continuum: more than a food safety issue. *Future Sci OA*, 7(5), Fso692.  
583 doi:10.2144/fsoa-2020-0189
- 584 Gerner-Smidt, P., Besser, J., Concepción-Acevedo, J., Folster, J. P., Huffman, J., Joseph, L.  
585 A., et al. (2019). Whole Genome Sequencing: Bridging One-Health Surveillance of  
586 Foodborne Diseases. *Front Public Health*, 7, 172. doi:10.3389/fpubh.2019.00172
- 587 Hennekinne, J. A., De Buyser, M. L., & Dragacci, S. (2012). Staphylococcus aureus and its  
588 food poisoning toxins: characterization and outbreak investigation. *FEMS Microbiol*  
589 *Rev*, 36(4), 815-836. doi:10.1111/j.1574-6976.2011.00311.x
- 590 Hoffmann, S., & Scallan Walter, E. (2020). Acute Complications and Sequelae from  
591 Foodborne Infections: Informing Priorities for Cost of Foodborne Illness Estimates.  
592 *Foodborne Pathog Dis*, 17(3), 172-177. doi:10.1089/fpd.2019.2664
- 593 Hu, Z., Peng, Z., Zhang, X., Li, Z., Jia, C., Li, X., et al. (2021). Prevalence and Molecular  
594 Characterization of Antimicrobial-Resistant Escherichia coli in Pig Farms,  
595 Slaughterhouses, and Terminal Markets in Henan Province of China. *Foodborne*  
596 *Pathog Dis*, 18(10), 733-743. doi:10.1089/fpd.2021.0011
- 597 Jiang, Z., & DuPont, H. (2017). Etiology of travellers' diarrhea. *Journal of Travel Medicine*,  
598 24(suppl\_1), S13-S16
- 599 Jønsson, R., Struve, C., Boll, E. J., Boisen, N., Joensen, K. G., Sørensen, C. A., et al. (2017).  
600 A Novel pAA Virulence Plasmid Encoding Toxins and Two Distinct Variants of the  
601 Fimbriae of Enterogastric Escherichia coli. *Front Microbiol*, 8, 263.  
602 doi:10.3389/fmicb.2017.00263

- 603 Jüch, M., Grabert, E., Rabsch, W., & Achenbach, H. J. (2013). Broncho-pulmonary  
604 salmonellosis – a case series and review of the literature. *Pneumologie*, *67*(3), 174-  
605 178. doi:10.1055/s-0032-1326027
- 606 Karabela Ş, N., Şenoğlu, S., Altuntaş Aydın, Ö., Baydili, K. N., Aksu, Ö., & Kart Yaşar, K.  
607 (2022). Foodborne streptococcal tonsillopharyngitis outbreak in a hospital. *Cent Eur J*  
608 *Public Health*, *30*(4), 225-229. doi:10.21101/cejph.a6027
- 609 Kayansamruaj, P., Soontara, C., Unajak, S., Dong, H. T., Rodkhum, C., Kondo, H., et al.  
610 (2019). Comparative genomics inferred two distinct populations of piscine pathogenic  
611 *Streptococcus agalactiae*, serotype Ia ST7 and serotype III ST283, in Thailand and  
612 Vietnam. *Genomics*, *111*(6), 1657-1667. doi:10.1016/j.ygeno.2018.11.016
- 613 Ko, D. S., Seong, W. J., Kim, D., Kim, E. K., Kim, N. H., Lee, C. Y., et al. (2018). Molecular  
614 prophage typing of *Staphylococcus aureus* isolates from bovine mastitis. *J Vet Sci*,  
615 *19*(6), 771-781. doi:10.4142/jvs.2018.19.6.771
- 616 Lawal, O. U., Fraqueza, M. J., Bouchami, O., Worning, P., Bartels, M. D., Gonçalves, M. L.,  
617 et al. (2021). Foodborne Origin and Local and Global Spread of *Staphylococcus*  
618 *saprophyticus* Causing Human Urinary Tract Infections. *Emerg Infect Dis*, *27*(3), 880-  
619 893. doi:10.3201/eid2703.200852
- 620 Li, X., & Tan, C. P. (2020). Interactions between Food Hazards and Intestinal Barrier: Impact  
621 on Foodborne Diseases. *68*(50), 14728-14738. doi:10.1021/acs.jafc.0c07378
- 622 Liao, F., Gu, W., Yang, Z., Mo, Z., Fan, L., Guo, Y., et al. (2018). Molecular characteristics  
623 of *Staphylococcus aureus* isolates from food surveillance in southwest China. *Bmc*  
624 *Microbiology*, *18*(1), 91. doi:10.1186/s12866-018-1239-z
- 625 Liu, C. M., Stegger, M., Aziz, M., Johnson, T. J., Waits, K., Nordstrom, L., et al. (2018).  
626 *Escherichia coli* ST131-H22 as a Foodborne Uropathogen. *mBio*, *9*(4).  
627 doi:10.1128/mBio.00470-18
- 628 Liu, Y., Zheng, X., Xu, L., Tong, P., Zhu, M., Peng, B., & Yao, G. (2021). Prevalence,  
629 Antimicrobial Resistance, and Molecular Characterization of *Staphylococcus aureus*  
630 Isolated from Animals, Meats, and Market Environments in Xinjiang, China.  
631 *Foodborne Pathog Dis*, *18*(10), 718-726. doi:10.1089/fpd.2020.2863
- 632 Lund, B. M., & O'Brien, S. J. (2011). The occurrence and prevention of foodborne disease in  
633 vulnerable people. *Foodborne Pathog Dis*, *8*(9), 961-973. doi:10.1089/fpd.2011.0860
- 634 Manges, A. R., Geum, H. M., Guo, A., Edens, T. J., Fibke, C. D., & Pitout, J. D. D. (2019).  
635 Global Extraintestinal Pathogenic *Escherichia coli* (ExPEC) Lineages. *Clinical*  
636 *microbiology reviews*, *32*(3), e00135-00118. doi:doi:10.1128/CMR.00135-18

- 637 Manges, A. R., & Johnson, J. R. (2012). Food-borne origins of Escherichia coli causing  
638 extraintestinal infections. *Clin Infect Dis*, 55(5), 712-719. doi:10.1093/cid/cis502
- 639 Martínez-Santos, V. I., Ruíz-Rosas, M., Ramirez-Peralta, A., Zaragoza García, O., Resendiz-  
640 Reyes, L. A., Romero-Pineda, O. J., & Castro-Alarcón, N. (2021). Enteroaggregative  
641 Escherichia coli is associated with antibiotic resistance and urinary tract infection  
642 symptomatology. *PeerJ*, 9, e11726. doi:10.7717/peerj.11726
- 643 Moraes, C. T. P., Longo, J., Silva, L. B., Pimenta, D. C., Carvalho, E., Morone, M., et al.  
644 (2020). Surface Protein Dispersin of Enteroaggregative Escherichia coli Binds  
645 Plasminogen That Is Converted Into Active Plasmin. *Front Microbiol*, 11, 1222.  
646 doi:10.3389/fmicb.2020.01222
- 647 Moran-Garcia, N., Lopez-Saucedo, C., Becerra, A., Meza-Segura, M., Hernandez-Cazares, F.,  
648 Guerrero-Baez, J., et al. (2022). A Novel Adult Murine Model of Typical  
649 Enteroaggregative Escherichia coli Infection Reveals Microbiota Dysbiosis, Mucus  
650 Secretion, and AAF/II-Mediated Expression and Localization of  $\beta$ -Catenin and  
651 Expression of MUC1 in Ileum. *Front Cell Infect Microbiol*, 12, 885191.  
652 doi:10.3389/fcimb.2022.885191
- 653 Murray, C. J. L., Ikuta, K. S., Sharara, F., Swetschinski, L., Robles Aguilar, G., Gray, A., et  
654 al. (2022). Global burden of bacterial antimicrobial resistance in 2019: a systematic  
655 analysis. *The Lancet*, 399(10325), 629-655. doi:10.1016/S0140-6736(21)02724-0
- 656 Newell, D. G., Koopmans, M., Verhoef, L., Duizer, E., Aidara-Kane, A., Sprong, H., et al.  
657 (2010). Food-borne diseases - the challenges of 20 years ago still persist while new  
658 ones continue to emerge. *Int J Food Microbiol*, 139 Suppl 1, S3-15.  
659 doi:10.1016/j.ijfoodmicro.2010.01.021
- 660 Opintan, J. A., Bishar, R. A., Newman, M. J., & Okeke, I. N. (2010). Carriage of  
661 diarrhoeagenic Escherichia coli by older children and adults in Accra, Ghana.  
662 *Transactions of the Royal Society of Tropical Medicine and Hygiene*, 104(7), 504-506.
- 663 Nordstrom, L., Liu, C. M., & Price, L. B. (2013). Foodborne urinary tract infections: a new  
664 paradigm for antimicrobial-resistant foodborne illness. *Front Microbiol*, 4, 29.  
665 doi:10.3389/fmicb.2013.00029
- 666 Pacheco, A. R., & Sperandio, V. (2012). Shiga toxin in enterohemorrhagic E.coli: regulation  
667 and novel anti-virulence strategies. *Front Cell Infect Microbiol*, 2, 81.  
668 doi:10.3389/fcimb.2012.00081



- 669 Pakbin, B., Brück, W. M., & Rossen, J. W. A. (2021). Virulence Factors of Enteric  
670 Pathogenic *Escherichia coli*: A Review. *Int J Mol Sci*, 22(18).  
671 doi:10.3390/ijms22189922
- 672 Park, J. H., Oh, S. S., Oh, K. H., Shin, J., Jang, E. J., Jun, B. Y., et al. (2014). Diarrheal  
673 outbreak caused by atypical enteropathogenic *Escherichia coli* O157:H45 in South  
674 Korea. *Foodborne Pathog Dis*, 11(10), 775-781. doi:10.1089/fpd.2014.1754
- 675 Pellegrini, A., Lentini, G., Famà, A., Bonacorsi, A., Scoffone, V. C., Buroni, S., et al. (2022).  
676 CodY Is a Global Transcriptional Regulator Required for Virulence in Group B  
677 *Streptococcus*. *Front Microbiol*, 13, 881549. doi:10.3389/fmicb.2022.881549
- 678 Pinaud, L., Sansonetti, P. J., & Phalipon, A. (2018). Host Cell Targeting by Enteropathogenic  
679 Bacteria T3SS Effectors. *Trends Microbiol*, 26(4), 266-283.  
680 doi:10.1016/j.tim.2018.01.010
- 681 Pornsukarom, S., van Vliet, A. H. M., & Thakur, S. (2018). Whole genome sequencing  
682 analysis of multiple *Salmonella* serovars provides insights into phylogenetic  
683 relatedness, antimicrobial resistance, and virulence markers across humans, food  
684 animals and agriculture environmental sources. *BMC Genomics*, 19(1), 801.  
685 doi:10.1186/s12864-018-5137-4
- 686 Pulford, C. V., Perez-Sepulveda, B. M., Rodwell, E. V., Weill, F. X., Baker, K. S., & Hinton,  
687 J. C. D. (2019). *Salmonella enterica* Serovar Panama, an Understudied Serovar  
688 Responsible for Extraintestinal Salmonellosis Worldwide. *Infect Immun*, 87(9).  
689 doi:10.1128/iai.00273-19
- 690 Riley, L. W. (2020). Extraintestinal Foodborne Pathogens. *Annu Rev Food Sci Technol*, 11,  
691 275-294. doi:10.1146/annurev-food-032519-051618
- 692 Riveros, M., García, W., García, C., Durand, D., Mercado, E., Ruiz, J., & Ochoa, T. J. (2017).  
693 Molecular and Phenotypic Characterization of Diarrheagenic *Escherichia coli* Strains  
694 Isolated from Bacteremic Children. *Am J Trop Med Hyg*, 97(5), 1329-1336.  
695 doi:10.4269/ajtmh.17-0066
- 696 Russo, T. A., & Johnson, J. R. (2003). Medical and economic impact of extraintestinal  
697 infections due to *Escherichia coli*: focus on an increasingly important endemic  
698 problem. *Microbes and Infection*, 5(5), 449-456. doi:https://doi.org/10.1016/S1286-  
699 4579(03)00049-2
- 700 Sarowska, J., Futoma-Koloch, B., Jama-Kmiecik, A., Frej-Madrzak, M., Ksiaczczyk, M.,  
701 Bugla-Ploskonska, G., & Choroszy-Krol, I. (2019). Virulence factors, prevalence and



- 702 potential transmission of extraintestinal pathogenic *Escherichia coli* isolated from  
703 different sources: recent reports. *Gut Pathog*, *11*, 10. doi:10.1186/s13099-019-0290-0
- 704 Scallan, E., Hoekstra, R. M., Angulo, F. J., Tauxe, R. V., Widdowson, M. A., Roy, S. L., et al.  
705 (2011). Foodborne illness acquired in the United States--major pathogens. *Emerg*  
706 *Infect Dis*, *17*(1), 7-15. doi:10.3201/eid1701.p11101
- 707 Schlech, W. F. (2019). Epidemiology and Clinical Manifestations of *Listeria monocytogenes*  
708 Infection. *Microbiol Spectr*, *7*(3). doi:10.1128/microbiolspec.GPP3-0014-2018
- 709 Seale, A. C., Bianchi-Jassir, F., Russell, N. J., Kohli-Lynch, M., Tann, C. J., Hall, J., et al.  
710 (2017). Estimates of the Burden of Group B Streptococcal Disease Worldwide for  
711 Pregnant Women, Stillbirths, and Children. *Clinical infectious diseases : an official*  
712 *publication of the Infectious Diseases Society of America*, *65*(suppl\_2), S200-s219.  
713 doi:10.1093/cid/cix664
- 714 Sheikh, A., Tumala, B., Vickers, T. J., Martin, J. C., Rosa, B. A., Sabui, S., et al. (2022).  
715 Enterotoxigenic *Escherichia coli* heat-labile toxin drives enteropathic changes in small  
716 intestinal epithelia. *Nat Commun*, *13*(1), 6886. doi:10.1038/s41467-022-34687-7
- 717 Shin, J., Yoon, K. B., Jeon, D. Y., Oh, S. S., Oh, K. H., Chung, G. T., et al. (2016).  
718 Consecutive Outbreaks of Enterotoxigenic *Escherichia coli* O6 in Schools in South  
719 Korea Caused by Contamination of Fermented Vegetable Kimchi. *Foodborne Pathog*  
720 *Dis*, *13*(10), 535-543. doi:10.1089/fpd.2016.2147
- 721 Simões, L. C., Silva, A. C. P., Santos, C. M., Alvim, D. C. S. S., Nery, D. C. M., Oliveira, L.  
722 M. A., et al. (2021). Unusual finding of the human-adapted hypervirulent serotype  
723 III/ST17 clone in a historical bovine Group B Streptococcus isolate from Brazil.  
724 *Brazilian Journal of Microbiology*, *52*(3), 1631-1635. doi:10.1007/s42770-021-00529-  
725 9
- 726 Singer, R. S. (2015). Urinary tract infections attributed to diverse ExPEC strains in food  
727 animals: evidence and data gaps. *Front Microbiol*, *6*, 28.  
728 doi:10.3389/fmicb.2015.00028
- 729 Sørensen, U. B. S., Klaas, I. C., Boes, J., & Farre, M. (2019). The distribution of clones of  
730 *Streptococcus agalactiae* (group B streptococci) among herdspersons and dairy cows  
731 demonstrates lack of host specificity for some lineages. *Vet Microbiol*, *235*, 71-79.  
732 doi:10.1016/j.vetmic.2019.06.008
- 733 Stanaway, J. D., Reiner, R. C., Blacker, B. F., Goldberg, E. M., Khalil, I. A., Troeger, C. E.,  
734 et al. (2019). The global burden of typhoid and paratyphoid fevers: a systematic

- 735 analysis for the Global Burden of Disease Study 2017. *The Lancet Infectious Diseases*,  
736 19(4), 369-381. doi:10.1016/S1473-3099(18)30685-6
- 737 Sun, H., Wan, Y., Du, P., & Bai, L. (2020). The Epidemiology of Monophasic Salmonella  
738 Typhimurium. *Foodborne Pathog Dis*, 17(2), 87-97. doi:10.1089/fpd.2019.2676
- 739 Sun, L., Yang, S., Deng, Q., Dong, K., Li, Y., Wu, S., & Huang, R. (2020). Salmonella  
740 Effector SpvB Disrupts Intestinal Epithelial Barrier Integrity for Bacterial  
741 Translocation. *Front Cell Infect Microbiol*, 10, 606541.  
742 doi:10.3389/fcimb.2020.606541
- 743 Tadesse, D. A., Zhao, S., Tong, E., Ayers, S., Singh, A., Bartholomew, M. J., & McDermott,  
744 P. F. (2012). Antimicrobial drug resistance in Escherichia coli from humans and food  
745 animals, United States, 1950-2002. *Emerg Infect Dis*, 18(5), 741-749.  
746 doi:10.3201/eid1805.111153
- 747 Tiruvayipati, S., Tang, W. Y., Barkham, T. M. S., & Chen, S. L. (2021). GBS-SBG - GBS  
748 Serotyping by Genome Sequencing. *Microb Genom*, 7(12).  
749 doi:10.1099/mgen.0.000688
- 750 Tiseo, K., Huber, L., Gilbert, M., Robinson, T. P., & Van Boeckel, T. P. (2020). Global  
751 Trends in Antimicrobial Use in Food Animals from 2017 to 2030. *Antibiotics (Basel)*,  
752 9(12). doi:10.3390/antibiotics9120918
- 753 Van Boeckel, T. P., Pires, J., Silvester, R., Zhao, C., Song, J., Criscuolo, N. G., et al. (2019).  
754 Global trends in antimicrobial resistance in animals in low- and middle-income  
755 countries. *Science*, 365(6459). doi:10.1126/science.aaw1944
- 756 van de Beek, D., Brouwer, M. C., Koedel, U., & Wall, E. C. (2021). Community-acquired  
757 bacterial meningitis. *Lancet*, 398(10306), 1171-1183. doi:10.1016/s0140-  
758 6736(21)00883-7
- 759 Ventola, C. L. (2015). The antibiotic resistance crisis: part 2: management strategies and new  
760 agents. *P t*, 40(5), 344-352.
- 761 Vidal, R. M., Muhsen, K., Tennant, S. M., Svennerholm, A. M., Sow, S. O., Sur, D., et al.  
762 (2019). Colonization factors among enterotoxigenic Escherichia coli isolates from  
763 children with moderate-to-severe diarrhea and from matched controls in the Global  
764 Enteric Multicenter Study (GEMS). *PLoS Negl Trop Dis*, 13(1), e0007037.  
765 doi:10.1371/journal.pntd.0007037
- 766 Wang, W., Liu, F., Baloch, Z., Zhang, C. S., Ma, K., Peng, Z. X., et al. (2017). Genotypic  
767 Characterization of Methicillin-resistant Staphylococcus aureus Isolated from Pigs and  
768 Retail Foods in China. *Biomed Environ Sci*, 30(8), 570-580. doi:10.3967/bes2017.076

- 769 WHO. (2015). *WHO estimates of the global burden of foodborne disease: foodborne diseases*  
770 *burden epidemiology reference group 2007-2015* (9241565160).
- 771 Yang, S. C., Lin, C. H., Aljuffali, I. A., & Fang, J. Y. (2017). Current pathogenic *Escherichia*  
772 *coli* foodborne outbreak cases and therapy development. *Arch Microbiol*, 199(6), 811-  
773 825. doi:10.1007/s00203-017-1393-y
- 774 Zaidi, M. B., McDermott, P. F., Fedorka-Cray, P., Leon, V., Canche, C., Hubert, S. K., et al  
775 . (2006). Nontyphoidal *Salmonella* from human clinical cases, asymptomatic children, and  
776 raw retail meats in Yucatan, Mexico. *Clin Infect Dis*, 42(1), 21-28.  
777 doi:10.1086/498508
- 778 Zaidi, M. B., & Estrada-García, T. (2014). *Shigella*: a highly virulent and elusive pathogen.  
779 *Current tropical medicine reports*, 1, 81-87.
- 780

**Table 1. Virulence factors of the major bacterial pathogens associated with foodborne disease.**

| Foodborne pathogen | Virulence factor                                                                                          | Mechanisms of action                                                                                                                                                                                                                                                                                                                                                                                                                             | References                                                          |
|--------------------|-----------------------------------------------------------------------------------------------------------|--------------------------------------------------------------------------------------------------------------------------------------------------------------------------------------------------------------------------------------------------------------------------------------------------------------------------------------------------------------------------------------------------------------------------------------------------|---------------------------------------------------------------------|
| EAEC               | <i>aggR</i>                                                                                               | Transcriptional activator, regulating the expression of various virulence factors encoded by the chromosome and pAA plasmid                                                                                                                                                                                                                                                                                                                      | (Pakbin, et al., 2021)                                              |
|                    | Aggregative Adherence Fimbriae ( <i>aggA</i> , <i>aafA</i> , <i>agg3A</i> , <i>agg4A</i> , <i>agg5A</i> ) | Mediate attachment to the intestinal mucosa and trigger host's inflammatory response. They also promote biofilm formation.                                                                                                                                                                                                                                                                                                                       | (Boll et al., 2017; Moraes et al., 2020; Moran-Garcia et al., 2022) |
|                    | Dispersin ( <i>aap</i> )                                                                                  | Overcomes the electrostatic attraction between fimbriae and the bacterial surface to ease the dispersion of EAEC across the intestinal mucosa.                                                                                                                                                                                                                                                                                                   | (Moraes et al., 2020)                                               |
|                    | pAA                                                                                                       | Plasmid that encodes for AAFs and toxins such as the autotransporter Pet and the heat-stable enterotoxin <i>astA</i> .                                                                                                                                                                                                                                                                                                                           | (Jønsson et al., 2017)                                              |
| ETEC               | Colonisation factors (CFA/I, CFA/II, CFA/IV)                                                              | Allow ETEC strains to attach the proximal small intestine enterocytes.                                                                                                                                                                                                                                                                                                                                                                           | (Vidal et al., 2019)                                                |
|                    | Labile toxin (LT I, LT II)                                                                                | Activate the production of cAMP leading to the activation of cellular kinases in charge of modulating the activity of sodium and chloride channels in the apical membrane of intestinal epithelial cells resulting in the efflux of salt and water in the intestinal lumen, and hence a watery diarrhoea.                                                                                                                                        | (Sheikh et al., 2022)                                               |
|                    | Heat-stable toxins (STa, STb)                                                                             | Binds its receptor sulfatide, on the surface of intestinal epithelial cells resulting in the activation of a pertussis toxin-sensitive GTP-binding regulatory protein. This leads to an influx of calcium into the cell and activation of calmodulin dependent protein kinase II which in turns opens Calcium-activated Chloride Channel (CaCC) allowing for the secretion of chloride into the intestinal lumen, resulting in watery diarrhoea. | (Sheikh et al., 2022)                                               |
| EPEC               | Type IV bundle-forming pilus ( <i>bfp</i> )                                                               | Formation of bacteria autoaggregate and localised adherence.                                                                                                                                                                                                                                                                                                                                                                                     | (Pakbin et al., 2021)                                               |
|                    | <i>eae</i>                                                                                                | Permits the attaching and effacing of enterocytes.                                                                                                                                                                                                                                                                                                                                                                                               | (Pakbin et al., 2021)                                               |
| EHEC               | Shigatoxin ( <i>stx1</i> and <i>stx2</i> )                                                                | Enters cells by endocytosis and is transported to the Golgi apparatus and then to the endoplasmic reticulum where it targets ribosomes, inactivating it and thus inhibiting protein synthesis.                                                                                                                                                                                                                                                   | (Pacheco & Sperandio, 2012)                                         |
| Salmonella spp.    | <i>Salmonella</i> plasmid virulence ( <i>spvB</i> )                                                       | Plasmid contributing to the loss of intestinal barrier integrity and promotes extra-intestinal dissemination of infection by facilitating translocation of <i>Salmonella</i> . The <i>spvB</i> gene is commonly indexed in the systemic dissemination of <i>Salmonella</i> infection and secreted into host cells via <i>Salmonella</i> pathogenicity islands (SPI-2) T3SS                                                                       | (Sun et al., 2020)                                                  |

EAEC: Enteraggregative *Escherichia coli*; ETEC: Enterotoxigenic *Escherichia coli*; EPEC: Enteropathogenic *Escherichia coli*, EHEC: Enterohemorrhagic *Escherichia coli*

**Table 2: Summary of the genetic evidence of extra-intestinal foodborne bacterial diseases**

| Country             | Study period          | Study Objective                                                                                                                                         | Bacteria                 | Human infection      | Food/Animal Source    | Genetic techniques          | Main findings                                                                                                                                                                                                                                              | Authors                     |
|---------------------|-----------------------|---------------------------------------------------------------------------------------------------------------------------------------------------------|--------------------------|----------------------|-----------------------|-----------------------------|------------------------------------------------------------------------------------------------------------------------------------------------------------------------------------------------------------------------------------------------------------|-----------------------------|
| USA                 | 2011-2012             | Assess the genetic relatedness, virulence and antibiotic resistance rates between <i>K. pneumoniae</i> isolates from UTIs, BSI and retail meat samples. | <i>K. pneumoniae</i>     | UTI<br>BSI           | Pork, turkey, chicken | MLST, WGS and SNP phylogeny | Four identical MLST pairs were found in both clinical and retail meat samples. Following phylogenetic analysis these pairs were closely related and displayed similar virulence profile using murine sepsis model.                                         | (Davis et al., 2015)        |
| USA                 | January-December 2012 | Evaluate the role of retail meat as a potential source of <i>ST131-H22</i> causing human UTI and BSI.                                                   | <i>E. coli ST131-H22</i> | UTI<br>BSI           | Pork, chicken         | WGS and SNP-based phylogeny | Six of human clinical <i>E. coli ST131-H22</i> strains were found in the same clade with meat and were closely related. Clinical strains harbouring CoIV plasmid, a plasmid ascribed APEC were more related to meat strains than those without the plasmid | (Liu et al., 2018)          |
| Worldwide           | 1997-2017             | Investigate the foodborne origin and spread of <i>S. saprophyticus</i> causing human UTI                                                                | <i>S. saprophyticus</i>  | UTI                  | Pig, pork             | WGS and SNP-based phylogeny | The meat food chain was an important source of <i>S. saprophyticus</i> causing human UTI as the live pig, meat and UTI <i>S. saprophyticus</i> strains were closely related after phylogenetic analysis.                                                   | (Lawal et al., 2021)        |
| Brazil              | 2019                  | Assess the phylogenetic link between bovine milk GBS isolates and those from human invasive disease                                                     | GBS                      | Sepsis<br>Meningitis | Bovine milk           | MLST, PFGE                  | Two blood, one CSF, and one bovine milk GBS serotype III/ST17 strains were highly related to each other ( $\geq 80\%$ similarity). These strains also had identical resistance profiles, harboured the same resistance and virulence genes tested.         | (Simões et al., 2021)       |
| Thailand<br>Vietnam | 2008-2016             | Perform the comparative genetic analysis of GBS strains from diseased fishes in Thailand and Vietnam                                                    | GBS                      | Meningitis           | Fish                  | WGS and cgMLST              | Thailand GBS ST283 strains were closely related to the Singaporean strain causing foodborne human invasive disease in 2015                                                                                                                                 | (Kayansamruaj et al., 2019) |
| Thailand            | 2011-2014             | Evaluate the genetic relatedness between GBS isolates from human sepsis, bovine mastitis and from fishes                                                | GBS                      | Sepsis               | Cattle, fish          | MLST and PFGE               | One human blood GBS serotype III was closely related ( $\geq 80\%$ similarity) to five identical (100% similarity) fish GBS serotype III isolates. A human blood sample was closely related to a bovine milk isolate.                                      | (Boonyayatra et al., 2020)  |

**Figure 1. Drivers of extra-intestinal foodborne diseases.**

Direct mechanism of EIFBD  
 Indirect mechanism of EIFBD  
 Concomitant mechanisms favouring EIFBD

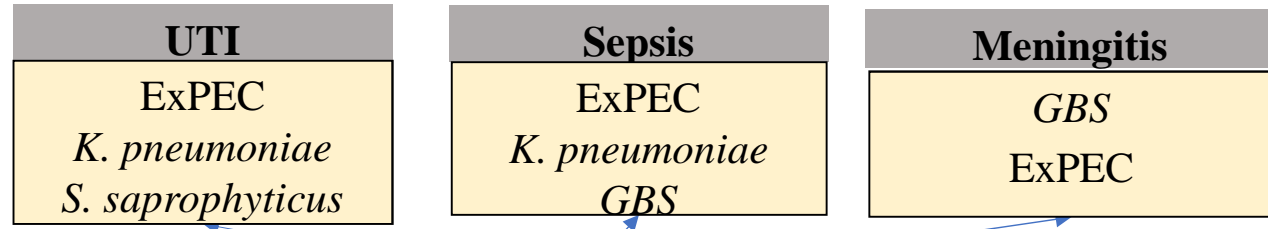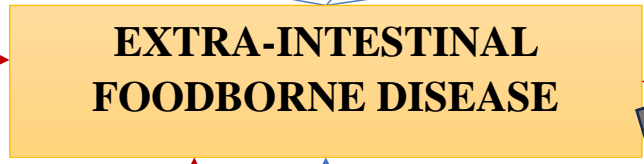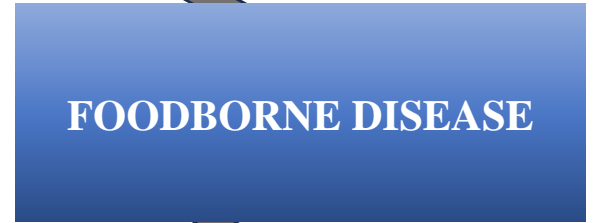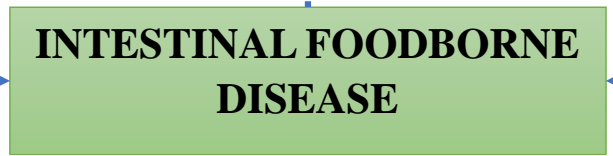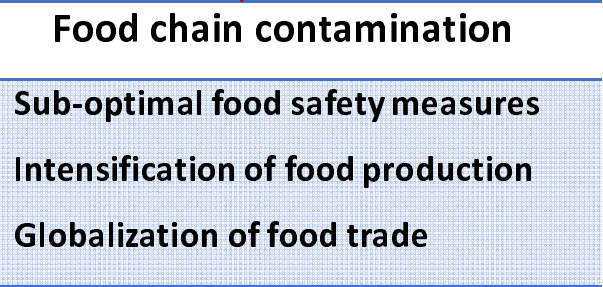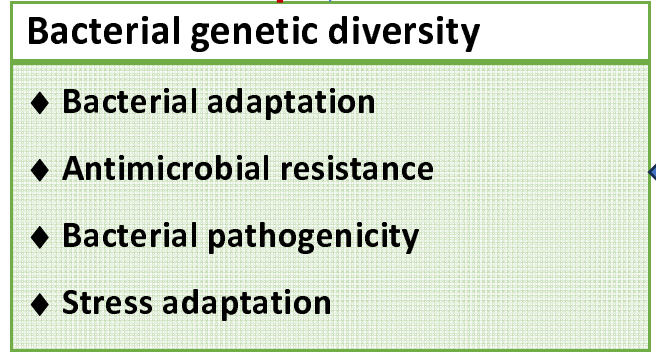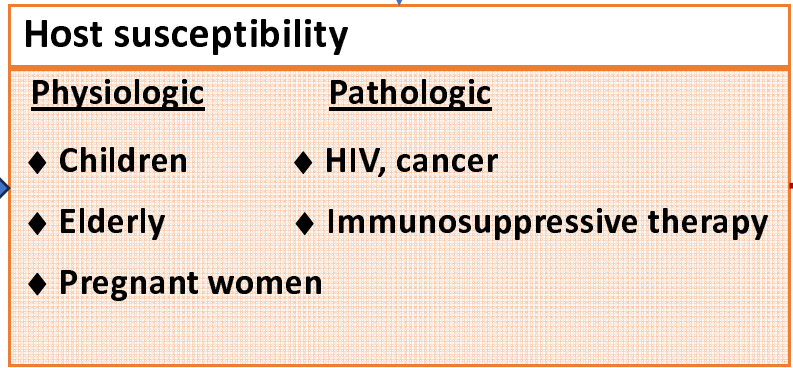

medRxiv preprint doi: <https://doi.org/10.1101/2024.02.22.24303194>; this version posted February 24, 2024. The copyright holder for this preprint (which was not certified by peer review) is the author/funder, who has granted medRxiv a license to display the preprint in perpetuity. It is made available under a [CC-BY-NC 4.0 International license](#).
